# Supplementary material for: Probability of severe postpartum hemorrhage in repeat cesarean deliveries: a multicenter retrospective study in China
Source: PubMed Central journal article supplement (PMC8055978; doi:10.1038/s41598-021-87830-7), 2021-04-19

**Probability of severe postpartum hemorrhage in repeat cesarean deliveries: a multicenter retrospective study in China**

Lili Du<sup>1,2#</sup>, Ling Feng<sup>6#</sup>, Shilei Bi<sup>1,2#</sup>, Lizi Zhang<sup>8</sup>, Jingman Tang<sup>1,2</sup>, Liuying Zhong<sup>1,2</sup>, Xingnan Zhou<sup>1,2</sup>, Hu Tan<sup>1,2</sup>, Lijun Huang<sup>1,2</sup>, Lin Lin<sup>1,2</sup>, Shanshan Zeng<sup>1,2</sup>, Luwen Ren<sup>1,2</sup>, Yinli Cao<sup>3</sup>, Jinping Jia<sup>4</sup>, Xianlan Zhao<sup>5</sup>, Shaoshuai Wang<sup>6</sup>, Xiaoyan Xu<sup>6</sup>, Yangyu Zhao<sup>7</sup>, Zhijian Wang<sup>8</sup>, Qiyong Zhu<sup>9</sup>, Hongbo Qi<sup>10</sup>, Lanzhen Zhang<sup>11</sup>, Suiwen Wen<sup>12</sup>, Hongtian Li<sup>13</sup>, Jingsi Chen<sup>1,2\*</sup>, Dunjin Chen<sup>1,2\*</sup>

Table S1 The characteristics of the pregnant women in SPPH and non-SPPH group

| Variables                | Non-SPPH(n=10796) | SPPH(n=278)           | P     |
|--------------------------|-------------------|-----------------------|-------|
| Age(years)               | 33(30,36)         | 34(29,36)             | 0.807 |
| Height(cm)               | 160(157,164)      | 160(156,164)          | 0.931 |
| Weight(kg)               | 59(52,65)         | 60(54,68)             | <0.05 |
| Gravida                  | 3(2,3)            | 3(2,4)                | <0.05 |
| Parity                   | 1(1,1)            | 1(1,2)                | <0.05 |
| Numbers of abortion      | 1(0,1)            | 1(0,2)                | <0.05 |
| Numbers of CD            | 1(1,1)            | 1(1,1)                | <0.05 |
| Interval months          | 72(48,108)        | 72(48,118.5)          | 0.297 |
| Gestational weeks        | 39(38,39)         | 37(35,38)             | <0.05 |
| Neonatal birth weight(g) | 3235(2940,3500)   | 2876.5(2437.5,3227.5) | <0.05 |
| Nationality              |                   |                       | 0.676 |
| Han population           | 10562(97.8%)      | 273(98.2%)            |       |
| Other                    | 234(2.2%)         | 5(1.8%)               |       |
| Abortion history         | 6388(59.2%)       | 206(74.1%)            | <0.05 |

|                                   |             |            |       |
|-----------------------------------|-------------|------------|-------|
| Natural abortion history          | 1132(10.5%) | 39(14%)    | 0.058 |
| Drug abortion history             | 725(6.7%)   | 32(11.5%)  | <0.05 |
| Artificial abortion history       | 5639(52.2%) | 185(66.5%) | <0.05 |
| Reason for previous CD            |             |            | <0.05 |
| Selective                         | 1709(15.8%) | 62(22.3%)  |       |
| Comorbidity                       | 7010(64.9%) | 161(57.9%) |       |
| Other                             | 2077(19.2%) | 55(19.8%)  |       |
| PP history                        | 138(1.3%)   | 12(4.3%)   | <0.05 |
| Placenta accreta history          | 19(0.2%)    | 3(1.1%)    | <0.05 |
| Endometrial injury                | 249(2.3%)   | 20(7.2%)   | <0.05 |
| ART                               | 265(2.5%)   | 11(4%)     | 0.113 |
| Source                            |             |            | <0.05 |
| Hospital                          | 8757(81.1%) | 187(67.3%) |       |
| Referral                          | 2039(18.9%) | 91(32.7%)  |       |
| Prom                              | 1422(13.2%) | 26(9.4%)   | 0.062 |
| Vaginal bleeding during pregnancy | 894(8.3%)   | 79(28.4%)  | <0.05 |
| Lower uterine segment tenderness  | 1198(11.1%) | 19(6.8%)   | <0.05 |
| PP                                | 1247(11.6%) | 218(78.4%) | <0.05 |
| Placenta accreta                  | 680(6.3%)   | 189(68%)   | <0.05 |
| PP and placenta accreta           | 422(3.9%)   | 176(63.3%) | <0.05 |

|                                |              |            |       |
|--------------------------------|--------------|------------|-------|
| Placenta abruption             | 114(1.1%)    | 7(2.5%)    | <0.05 |
| Polyhydramnios                 | 747(6.9%)    | 16(5.8%)   | 0.449 |
| Oligohydramnios                | 905(8.4%)    | 16(5.8%)   | 0.117 |
| Macrosomia                     | 1723(16%)    | 8(2.9%)    | <0.05 |
| FGR                            | 181(1.7%)    | 4(1.4%)    | 1     |
| Hypertension disorders         | 1183(11%)    | 30(10.8%)  | 0.93  |
| GDM                            | 2593(24%)    | 56(20.1%)  | 0.135 |
| Type of RCD                    |              |            | 0.773 |
| ERCD                           | 10673(98.9%) | 276(99.3%) |       |
| Failed TOLAC                   | 123(1.1%)    | 2(0.7%)    |       |
| Reason for CD                  |              |            | <0.05 |
| Selective                      | 6964(64.5%)  | 111(39.9%) |       |
| Comorbidity                    | 3832(35.5%)  | 167(60.1%) |       |
| Time of CD                     |              |            | <0.05 |
| Elective                       | 7867(72.9%)  | 222(79.9%) |       |
| Emergency                      | 2929(27.1%)  | 56(20.1%)  |       |
| Fetal sex                      |              |            | 0.52  |
| Male                           | 5996(55.5%)  | 149(53.6%) |       |
| Female                         | 4800(44.5%)  | 129(46.45) |       |
| Pelvic adhesion during RCD     | 2879(26.75)  | 157(56.5%) | <0.05 |
| Uterine incision status during |              |            |       |
| RCD                            |              |            | <0.05 |

|                    |             |            |
|--------------------|-------------|------------|
| Normal             | 8135(75.4%) | 137(49.3%) |
| Thin               | 2513(23.3%) | 136(48.9%) |
| Incomplete rupture | 129(1.2%)   | 4(1.4%)    |
| Rupture            | 19(0.2%)    | 1(0.4%)    |

SPPH: severe postpartum hemorrhage; CD: cesarean delivery; RCD: repeat cesarean delivery; PP: placenta previa; ART: artificial assisted reproductive technology; FGR: fetal growth restriction; GDM: gestational diabetes mellitus; ERCD: elective repeat cesarean delivery; TOLAC: trial of labor after cesarean; Endometrial injury other than history of prior cesarean delivery includes uterine curettage, hysteromyomectomy, hysteroscopic surgery and other reason that damaged the endometrium

Table S2 Missingness table by group of SPPH

| Variables                | Non-SPPH(n=10796) | SPPH(n=278) | P     |
|--------------------------|-------------------|-------------|-------|
| Age(years)               | 0(0.00%)          | 0(0.00%)    |       |
| Height(cm <sup>2</sup> ) | 405(3.75%)        | 16(5.76%)   | 0.117 |
| Weight(kg)               | 864(8.00%)        | 26(9.35%)   | 0.48  |
| Gravida                  | 0(0.00%)          | 0(0.00%)    |       |
| Parity                   | 14(0.13%)         | 1(0.36%)    | 0.317 |
| Numbers of abortion      | 0(0.00%)          | 0(0.00%)    |       |
| Numbers of CD            | 73(0.68%)         | 2(0.72%)    | 0.713 |
| Interval months          | 52(0.48%)         | 1(0.36%)    | 1     |
| Gestational weeks        | 0(0.00%)          | 0(0.00%)    |       |
| Neonatal birth weight(g) | 1008(9.34%)       | 42(15.1%)   | 0.002 |
| Nationality              | 22(0.20%)         | 1(0.36%)    | 0.443 |

|                                   |             |           |       |
|-----------------------------------|-------------|-----------|-------|
| Abortion history                  | 0(0.00%)    | 0(0.00%)  |       |
| Natural abortion history          | 300(2.78%)  | 8(2.88%)  | 1     |
| Drug abortion history             | 0(0.00%)    | 0(0.00%)  |       |
| Artificial abortion history       | 395(3.66%)  | 11(3.96%) | 0.921 |
| Reason for previous CD            | 0(0.00%)    | 0(0.00%)  |       |
| PP history                        | 851(7.88%)  | 22(7.91%) | 1     |
| Placenta accreta history          | 1368(12.7%) | 52(18.7%) | 0.004 |
| Endometrial injury                | 1586(14.7%) | 27(9.71%) | 0.025 |
| ART                               | 57(0.53%)   | 5(1.8%)   | 0.019 |
| Source                            | 56(0.52%)   | 0(0.00%)  | 0.406 |
| Prom                              | 546(5.06%)  | 12(4.32%) | 0.675 |
| Vaginal bleeding during pregnancy | 611(5.66%)  | 12(4.32%) | 0.408 |
| Lower uterine segment tenderness  | 618(5.72%)  | 16(5.76%) | 1     |
| PP                                | 645(5.97%)  | 9(3.24%)  | 0.075 |
| Placenta accreta                  | 671(6.22%)  | 9(3.24%)  | 0.055 |
| PP and placenta accreta           | 650(6.02%)  | 8(2.88%)  | 0.039 |
| Placenta abruption                | 695(6.44%)  | 16(5.76%) | 0.738 |
| Polyhydramnios                    | 689(6.38%)  | 15(5.4%)  | 0.588 |
| Oligohydramnios                   | 680(6.3%)   | 17(6.12%) | 1     |
| Macrosomia                        | 763(7.07%)  | 17(6.12%) | 0.621 |
| FGR                               | 703(6.51%)  | 18(6.47%) | 1     |
| Hypertension disorders            | 665(6.16%)  | 18(6.47%) | 0.929 |

|                                    |             |           |       |
|------------------------------------|-------------|-----------|-------|
| GDM                                | 636(5.89%)  | 18(6.47%) | 0.78  |
| Type of RCD                        | 0(0.00%)    | 0(0.00%)  |       |
| Reason for RCD                     | 1405(13.0%) | 44(15.8%) | 0.199 |
| Fetal sex                          | 0(0.00%)    | 0(0.00%)  |       |
| Pelvic adhesion during RCD         | 805(7.46%)  | 21(7.55%) | 1     |
| Uterine incision status during RCD | 857(7.94%)  | 26(9.35%) | 0.455 |

SPPH: severe postpartum hemorrhage; CD: cesarean delivery; RCD: repeat cesarean delivery PP: placenta previa; ART: artificial assisted reproductive technology; FGR: fetal growth restriction; GDM: gestational diabetes mellitus;

Endometrial injury other than history of prior cesarean delivery includes uterine curettage, hysteromyomectomy, hysteroscopic surgery and other reason that damaged the endometrium

Table S3 The characteristics of the pregnant women in development and validation group

| Variables           | Development(n=9177) | Validation(n=1897) | P     |
|---------------------|---------------------|--------------------|-------|
| Age(years)          | 33(30,36)           | 34(30,36)          | <0.05 |
| Height(cm)          | 160(157,164)        | 160(157,164)       | 0.42  |
| Weight(kg)          | 59(52,66)           | 57(52,64.5)        | <0.05 |
| Gravida             | 3(2,3)              | 3(2,4)             | <0.05 |
| Parity              | 1(1,1)              | 1(1,1)             | <0.05 |
| Numbers of abortion | 1(0,1)              | 1(0,1)             | 0.107 |
| Numbers of CD       | 1(1,1)              | 1(1,1)             | <0.05 |
| Interval months     | 72(48,108)          | 66(48,105)         | <0.05 |
| Gestational weeks   | 39(38,39)           | 39(38,39)          | <0.05 |

|                                   |                 |                 |       |
|-----------------------------------|-----------------|-----------------|-------|
| Neonatal birth weight(g)          | 3250(2950,3510) | 3150(2850,3450) | <0.05 |
| Nationality                       |                 |                 | <0.05 |
| Han population                    | 8942(97.4%)     | 1893(99.8%)     |       |
| Other                             | 235(2.6%)       | 4(0.2%)         |       |
| Abortion history                  | 5477(59.7%)     | 1117(58.9%)     | 0.518 |
| Natural abortion history          | 957(10.5%)      | 204(10.8%)      | 0.78  |
| Drug abortion history             | 558(6.1%)       | 199(10.5%)      | <0.05 |
| Artificial abortion history       | 4879(53.2%)     | 945(49.8%)      | <0.05 |
| Reason for previous CD            |                 |                 | <0.05 |
| Selective                         | 1646(17.9%)     | 125(6.6%)       |       |
| Comorbidity                       | 5844(63.7%)     | 1327(70.0%)     |       |
| Other                             | 1687(18.4%)     | 445(23.5%)      |       |
| PP history                        | 123(1.3%)       | 27(1.4%)        | 0.776 |
| Placenta accreta history          | 15(0.2%)        | 7(0.4%)         | 0.067 |
| Endometrial injury                | 216(2.4%)       | 53(2.8%)        | 0.257 |
| ART                               | 237(2.6%)       | 39(2.1%)        | 0.180 |
| Source                            |                 |                 | <0.05 |
| Hospital                          | 7902(86.1%)     | 1042(54.9%)     |       |
| Referral                          | 1275(13.9%)     | 855(45.1%)      |       |
| Prom                              | 1266(13.8%)     | 182(9.6%)       | <0.05 |
| Vaginal bleeding during pregnancy | 845(9.2%)       | 128(6.7%)       | <0.05 |

|                         |             |             |       |
|-------------------------|-------------|-------------|-------|
| Lower uterine segment   |             |             |       |
| tenderness              | 1119(12.2%) | 98(5.2%)    | <0.05 |
| PP                      | 1255(13.7%) | 210(11.1%)  | <0.05 |
| Placenta accreta        | 701(7.6%)   | 168(8.9%)   | 0.073 |
| PP and placenta accreta | 460(5.0%)   | 138(7.3%)   | <0.05 |
| Placenta abruption      | 112(1.2%)   | 9(0.5%)     | <0.05 |
| Polyhydramnios          | 701(7.6%)   | 62(3.3%)    | <0.05 |
| Oligohydramnios         | 815(8.9%)   | 106(5.6%)   | <0.05 |
| Macrosomia              | 1070(11.7%) | 661(34.8%)  | <0.05 |
| FGR                     | 138(1.5%)   | 47(2.5%)    | <0.05 |
| Hypertension disorders  | 1038(11.3%) | 175(9.2%)   | <0.05 |
| GDM                     | 2289(24.9%) | 360(19.0%)  | <0.05 |
| Type of RCD             |             |             | <0.05 |
| ERCD                    | 9082(99.0%) | 1867(98.4%) |       |
| Failed TOLAC            | 95(1.0%)    | 30(1.6%)    |       |
| Reason for CD           |             |             | <0.05 |
| Selective               | 6220(67.8%) | 855(45.1%)  |       |
| Comorbidity             | 2957(32.2%) | 1042(54.9%) |       |
| Time of CD              |             |             | <0.05 |
| Elective                | 6649(72.5%) | 1440(79.9%) |       |
| Emergency               | 2528(27.5%) | 457(24.1%)  |       |
| Fetal sex               |             |             | <0.05 |



|                                |             |             |       |
|--------------------------------|-------------|-------------|-------|
| Male                           | 5044(55.0%) | 1101(58.0%) |       |
| Female                         | 4133(45.0%) | 796(42.0%)  |       |
| Pelvic adhesion during RCD     | 2595(28.3%) | 441(23.2%)  | <0.05 |
| Uterine incision status during |             |             |       |
| RCD                            |             |             | <0.05 |
| Normal                         | 6864(74.8%) | 1408(74.2%) |       |
| Thin                           | 2164(23.6%) | 485(25.6%)  |       |
| Incomplete rupture             | 129(1.4%)   | 4(0.2%)     |       |
| Rupture                        | 20(0.2%)    | 0(0.0%)     |       |

---

SPPH: severe postpartum hemorrhage; CD: cesarean delivery; RCD: repeat cesarean delivery; PP: placenta previa; ART: artificial assisted reproductive technology; FGR: fetal growth restriction; GDM: gestational diabetes mellitus; ERCD: elective repeat cesarean delivery; TOLAC: trial of labor after cesarean; Endometrial injury other than history of prior cesarean delivery includes uterine curettage, hysteromyomectomy, hysteroscopic surgery and other reason that damaged the endometrium

Fig. S1 Distributions of SPPH Probabilities.

The distribution of SPPH probabilities, based on the simple model, is shown among persons with SPPH and those without SPPH in the development and Validation data sets.

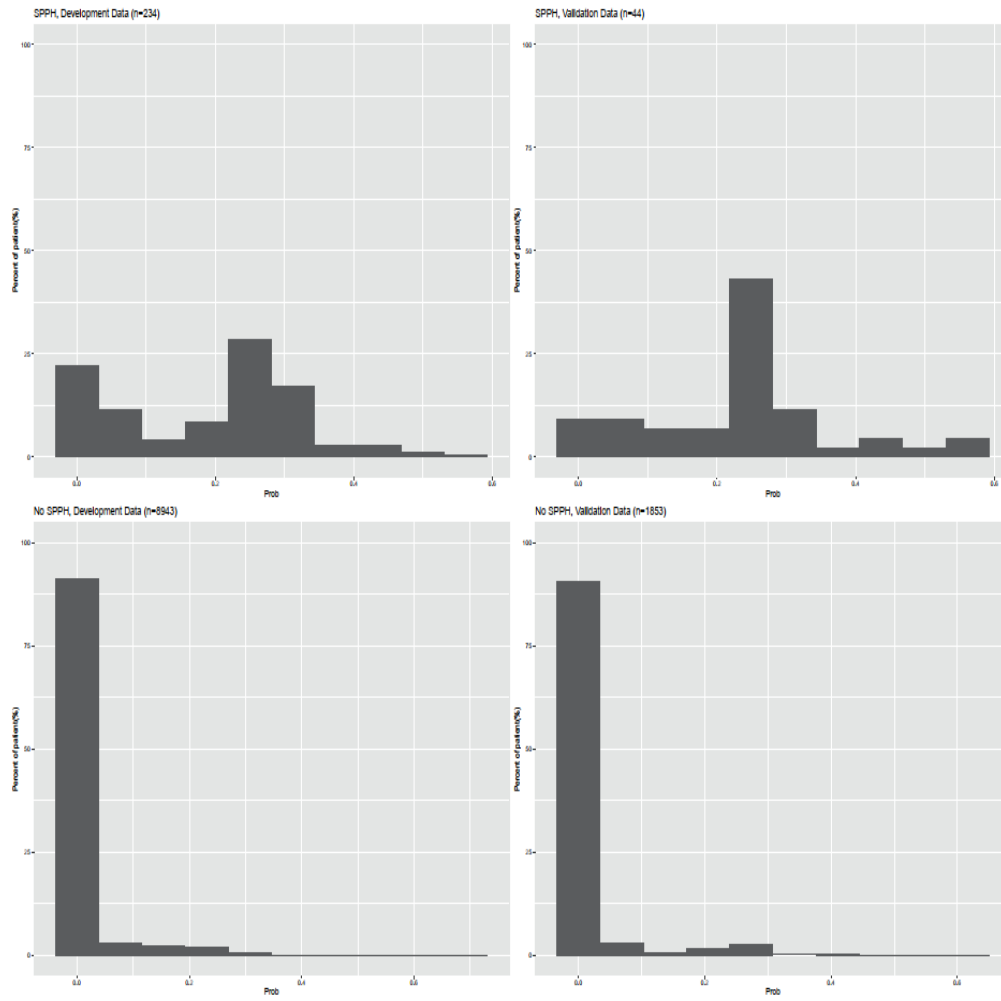

Fig. S2 DCA of the four models in development data and validation data

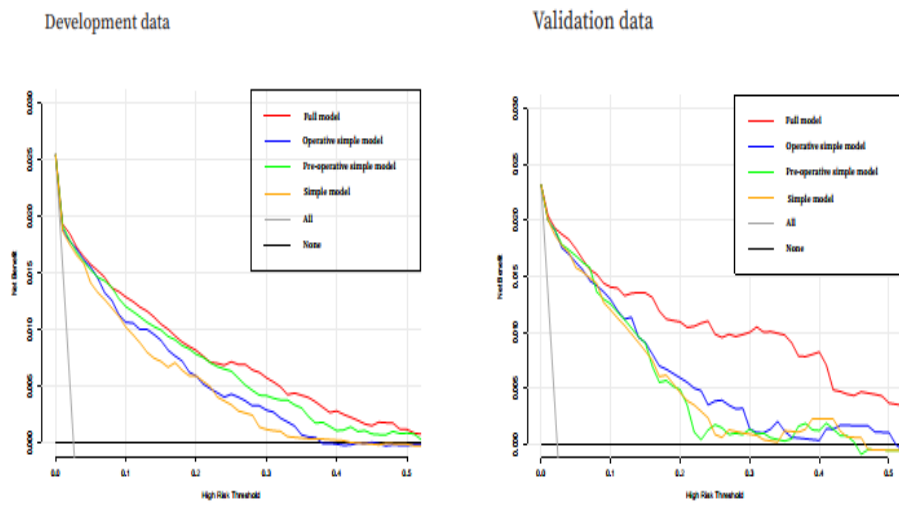

Fig. S3 Nomogram of pre-operative model.

Caption: CD: cesarean delivery; PP: placenta previa; SPPH: severe postpartum hemorrhage;

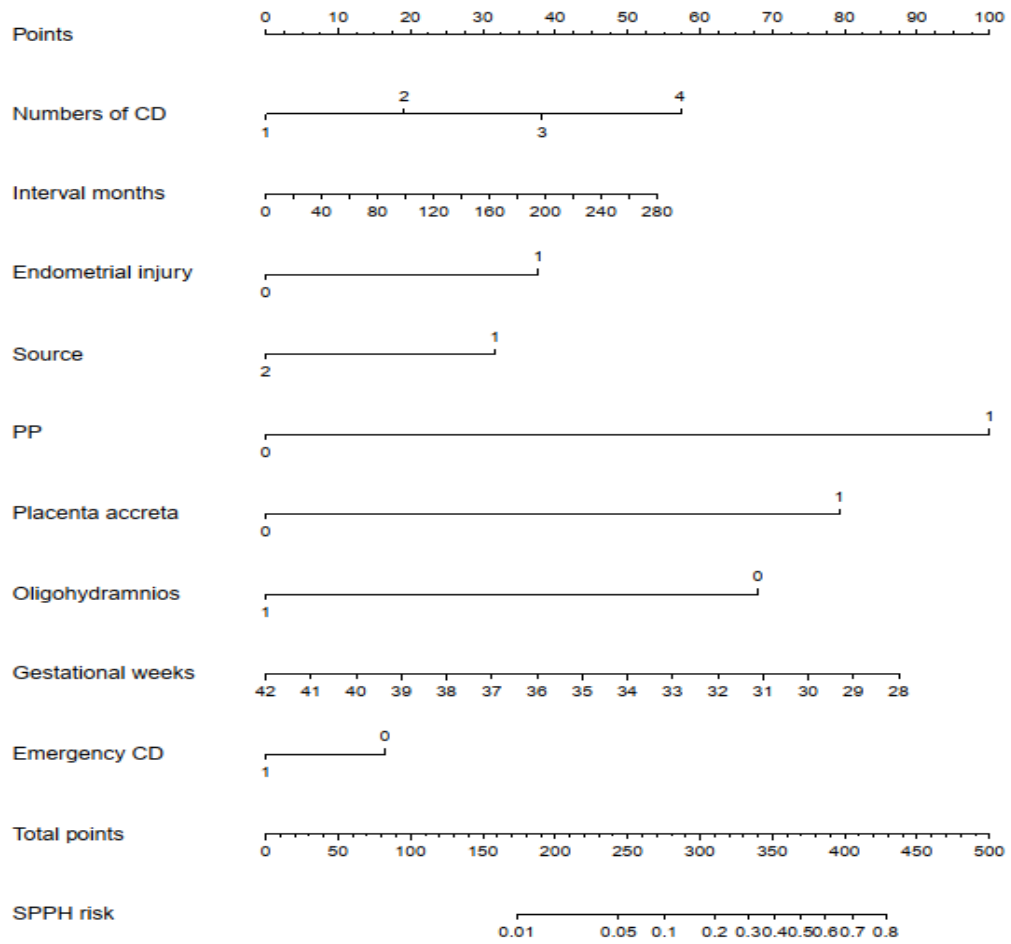

Fig. S4 ROC curves based on the simple model in three separate hospital data sets.

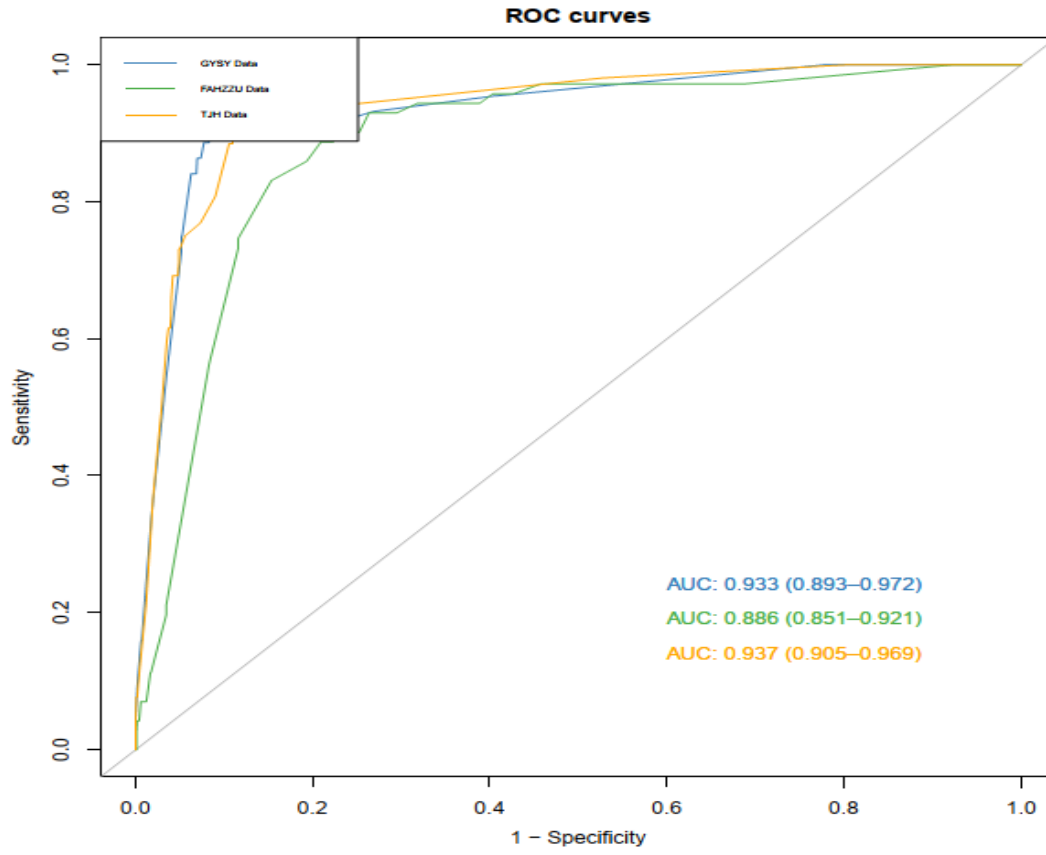

Fig. S5 A: Smooth curve fitting of interval month and SPPH; B: Smooth curve fitting of gestational week and

SPPH

A

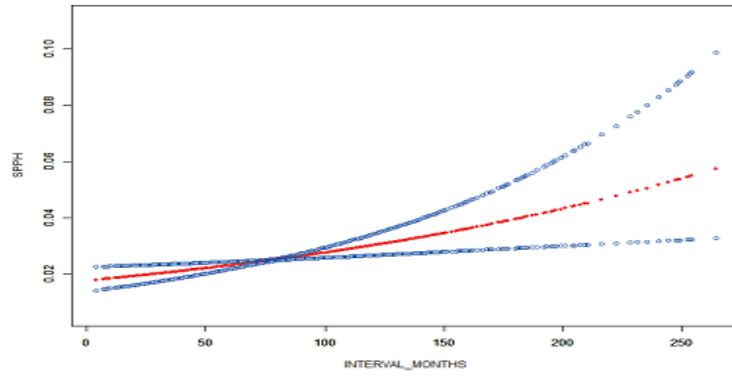

B

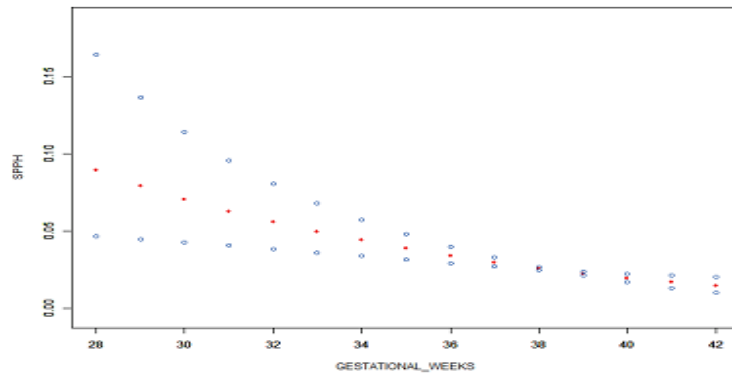

Supplement: 41598_2021_87830_MOESM1_ESM.pdf [file 41598_2021_87830_MOESM1_ESM.pdf]
